# Supplementary material
Source: PubMed Central journal article supplement (PMC7755963)
Supplement: Suppl_SERPIN.pdf [file Suppl_SERPIN.pdf]

## SUPPLEMENTARY MATERIAL

### ***SERPINA9* and *SERPINB2*: novel cartilage lineage differentiation factors of human mesenchymal stem cells.**

Julio Granados-Montiel MD<sup>1,2</sup>, Monica Cruz-Lemini MD PhD<sup>3</sup>, Claudia Rangel-Escareño MSc PhD<sup>4</sup>, Gabriela Martinez-Nava PhD<sup>5</sup>, Alberto Lopez-Reyes PhD<sup>5</sup>, Clemente Ibarra MD PhD<sup>1</sup>.

<sup>1</sup>Tissue Engineering, Cell Therapy and Regenerative Medicine Research Unit, Instituto Nacional de Rehabilitación “Luis Guillermo Ibarra Ibarra”, Mexico City, Mexico.

<sup>2</sup>Centre for Craniofacial and Regenerative Biology, King's College London, Guy's Hospital, London, United Kingdom.

<sup>3</sup>Fetal Medicine Mexico, Fetal Surgery Research Unit, Unidad de Investigación en Neurodesarrollo, Instituto de Neurobiología, Universidad Nacional Autónoma de México (UNAM) - Campus Juriquilla, Queretaro, Mexico.

<sup>4</sup>Computational Genomics Lab., Instituto Nacional de Medicina Genómica, Mexico City, México.

<sup>5</sup>Synovioanalysis Molecular Laboratory, Instituto Nacional de Rehabilitación “Luis Guillermo Ibarra Ibarra”, Mexico City, Mexico.

## SUPPLEMENTARY TABLES

**Table S1. Features of the primers used for gene expression assays.**

| Gene                                         | Gene symbol     | QIAGEN<br>Primer ID | Fragment size<br>(bp) | Melting<br>temperature |
|----------------------------------------------|-----------------|---------------------|-----------------------|------------------------|
| Peptidylprolyl isomerase A                   | <i>PPIA</i>     | PPH01319G           | 131                   | 81°C                   |
| SRY (sex determining region Y)-box9          | <i>SOX9</i>     | PPH02125A           | 172                   | 88°C                   |
| Runt-related transcription factor 2          | <i>RUNX2</i>    | PPH01897C           | 102                   | 83.9°C                 |
| Serpin peptidase inhibitor, clade B member 2 | <i>SERPINB2</i> | PPH00793C           | 111                   | 83.9°C                 |
| Serpin peptidase inhibitor, clade A member 9 | <i>SERPINA9</i> | PPH16847A           | 110                   | 80.5°C                 |

### **Tables S2-S5 (SupplTables SERPIN.xls)**

- **Table S2. Differentially expressed genes between naïve hMSC and chondrocytes.**  
hMSC, human bone marrow mesenchymal stem cells.
- **Table S3. Differentially expressed genes between naïve hMSC and chondrocytes with ROCK inhibitor Y27632.**  
hMSC, human bone marrow mesenchymal stem cells; ROCK, Rho-associated coiled-coil containing protein kinase.
- **Table S4. Differentially expressed genes between naïve hMSC and osteoblasts.**  
hMSC, human bone marrow mesenchymal stem cells.
- **Table S5. Differentially expressed genes between naïve hMSC and osteoblasts with ROCK inhibitor Y27632.**  
hMSC, human bone marrow mesenchymal stem cells; ROCK, Rho-associated coiled-coil containing protein kinase.
